# Supplementary material for: Risk Perception and Anxiety Regarding Radiation after the 2011 Fukushima Nuclear Power Plant Accident: A Systematic Qualitative Review
Source: Int J Environ Res Public Health. 2017 Oct 27;14(11):1306. doi: 10.3390/ijerph14111306 (PMC5707945; doi:10.3390/ijerph14111306)
Supplement: Supplementary file 1 [file ijerph-14-01306-s001.pdf]

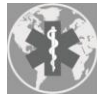

# Supplementary Materials: Risk Perception and Anxiety Regarding Radiation after the 2011 Fukushima Nuclear Power Plant Accident: A Systematic Qualitative Review

Yoshitake Takebayashi <sup>1,2</sup>, Yuliya Lyamzina <sup>2</sup>, Yuriko Suzuki <sup>3</sup> and Michio Murakami <sup>1,2,\*</sup>

**Table S1.** Summaries of included articles examined governing factors of risk perceptions and anxieties regarding radiation after the FDNPP accident.

| Citation          | Sample Characteristics | N         | Study Design    | Period for Data Collection | Measure for Risk Perception or Anxiety                            | Factors Related to Risk Perception or Anxiety Regarding Radiation                                                                                                                                                                                                                                                                                                                        | Factors Related to Risk Perception or Anxiety Regarding Radiation                                                                                                                                                    | Adjusted Covariates                                                                                                                                               |
|-------------------|------------------------|-----------|-----------------|----------------------------|-------------------------------------------------------------------|------------------------------------------------------------------------------------------------------------------------------------------------------------------------------------------------------------------------------------------------------------------------------------------------------------------------------------------------------------------------------------------|----------------------------------------------------------------------------------------------------------------------------------------------------------------------------------------------------------------------|-------------------------------------------------------------------------------------------------------------------------------------------------------------------|
|                   |                        |           |                 |                            |                                                                   | Positive association                                                                                                                                                                                                                                                                                                                                                                     | Negative association                                                                                                                                                                                                 |                                                                                                                                                                   |
| Suzuki et al. [7] | Residents of Fukushima | 56<br>556 | Cross sectional | Jan-12                     | <b>Lindell's risk perception model</b><br>Immediate health effect | [Odds Ratio (99%CI) from multiple logistic regression]<br><b>Demographics</b><br>Age (>64 years) [1.78 (1.53–2.07)] (ref. 15–39 years),<br><br><b>Disaster related stressors</b><br>House damage (partial collapse and worse) [1.59 (1.39–1.82)]<br>Bereavement [1.46 (1.29–1.65)]<br>Living other than own house [1.22 (1.07–1.40)]<br>Decreased income[1.36 (1.19–1.55)]               | [Odds Ratio (99%CI) from multiple logistic regression]<br><b>Demographics</b><br>Educational attainment: Vocational college, junior college or more [0.67 (0.58–0.77)] (ref. elementary, junior high or high school) | Sex, age, educational attainment, house damage, bereavement, living place, living arrangement at time of survey, type of work became unemployed, decreased income |
|                   |                        |           |                 |                            | Delayed health effect                                             | <b>Demographics</b><br>Woman [1.20 (1.12–1.28)]<br><br><b>Disaster related stressors</b><br>House damage (partial collapse and worse) [1.28 (1.18–1.40)],<br>Bereavement [1.39 (1.29–1.50)],<br>Living out of Fukushima prefecture [1.19(1.10–1.29)],<br>Living other than own house [1.17 (1.08–1.26)],<br>Became unemployment [1.23(1.13–1.33)],<br>Decreased income[1.39 (1.29–1.50)] | <b>Demographics</b><br>Educational attainment: Vocational college, junior college or more [0.83 (0.77–0.90)] (ref. elementary, junior high or high school)                                                           | Sex, age, educational attainment, house damage, bereavement, living place, living arrangement at time of survey, type of work became unemployed, decreased income |
|                   |                        |           |                 |                            | Genetic effect                                                    | <b>Demographics</b><br>Age (>64 years) [1.78 (1.53–2.07)] (ref. 15–39 years),<br>Age (>50–64 years) [1.12 (1.04–1.20)]                                                                                                                                                                                                                                                                   | <b>Demographics</b><br>Educational attainment: Vocational college, junior college or more [0.81 (0.76–                                                                                                               | Sex, age, educational attainment, house damage, bereavement, living place, living arrangement at time of survey, type of work became                              |

|                     |                                                                                                                |      |                 |                   |                                                                                                                                                                                                                        |                                                                                                                                                                                                                                                                                                                                                                                        |                                                                                                                                                                                                                                                                        |                                                                                                                                                                                                                                                                           |
|---------------------|----------------------------------------------------------------------------------------------------------------|------|-----------------|-------------------|------------------------------------------------------------------------------------------------------------------------------------------------------------------------------------------------------------------------|----------------------------------------------------------------------------------------------------------------------------------------------------------------------------------------------------------------------------------------------------------------------------------------------------------------------------------------------------------------------------------------|------------------------------------------------------------------------------------------------------------------------------------------------------------------------------------------------------------------------------------------------------------------------|---------------------------------------------------------------------------------------------------------------------------------------------------------------------------------------------------------------------------------------------------------------------------|
|                     |                                                                                                                |      |                 |                   |                                                                                                                                                                                                                        | (ref. 15–39 years),<br>Woman [1.20 (1.12–1.28)]                                                                                                                                                                                                                                                                                                                                        | 0.87)] (ref. elementary,<br>junior high or high school)                                                                                                                                                                                                                | unemployed, decreased income                                                                                                                                                                                                                                              |
|                     |                                                                                                                |      |                 |                   |                                                                                                                                                                                                                        | <b>Disaster related stressors</b><br>House damage (partial collapse and worse) [1.22 (1.12–1.32)]<br>Bereavement [1.42 (1.32–1.52)]<br>Living out of Fukushima prefecture [1.08(1.00–1.17)]<br>Living other than own house [1.14 (1.07–1.22)]<br>Became unemployment [1.26(1.17–1.36)]<br>Decreased income[1.39 (1.29–1.49)]<br>[Odds ratio (95%CI) from multiple logistic regression] |                                                                                                                                                                                                                                                                        |                                                                                                                                                                                                                                                                           |
| Yoshida et al. [16] | Public health nurse in the Fukushima prefecture                                                                | 430  | Cross sectional | Jul-15            | <b>Single item overall rating</b><br>Single item 10 point likert scale for radiation anxiety (ranging from no anxiety (1) to having a lot of anxiety (10)<br>1 to 5 anxiety(-), 6 to 10 anxiety (+)                    | <b>Demographics</b><br>Public health nurse at the time of the accident [2.37 (1.27 to 4.42)]                                                                                                                                                                                                                                                                                           |                                                                                                                                                                                                                                                                        | Age, manager in the workplace, public health nurse at the time of the accidents, difficulty answering radiation questions in the past                                                                                                                                     |
|                     |                                                                                                                |      |                 |                   |                                                                                                                                                                                                                        | <b>Radiation related-variables</b><br>Currently have materials to obtain knowledge about radiation [2.11 (1.25 to 3.60)]<br>Knowledge about childhood thyroid cancer increase after the Chernobyl accident [1.69 (1.04 to 2.75)]<br>[Odds ratio (95%CI) from multiple logistic regression]                                                                                             |                                                                                                                                                                                                                                                                        |                                                                                                                                                                                                                                                                           |
| Hidaka et al. [17]  | Radiation decontamination workers in Fukushima prefecture                                                      | 1505 | Cross sectional | Oct-13            | <b>Single item overall anxiety</b><br>How much anxiety do you have over radiation exposure ?The answers were then measured on a four-point scale ( 1 = “ Very much, ” 2 = “Somewhat,” 3=“A little bit,” and 4=“None”). | <b>Radiation related-variables</b><br>Checking the dose rate and keeping out of high dose areas [0.375 (0.006, 0.744)]                                                                                                                                                                                                                                                                 | [Odds ratio (95%CI) from multiple logistic regression]<br><b>Radiation related-variables</b><br>Written contract with current company regarding vacation, wages, and perquisite [-0.605 (-1.188, -0.021)],<br>Close persons for consultation [-0.454 (-0.873, -0.034)] | Age, previous residence, radiation passbook, Public assistance, training sessions, watching a video, physical condition check, self-study with materials, self-study without materials, monitoring external exposure, wearing a mask, wearing a radiation protection suit |
| Hino et al [18]     | Explanatory meeting participants (749 people in Fukushima and 50 outside Fukushima (in Yamagata) participated) | 749  | Cross sectional | Sep-14 to June-15 | <b>Single item specific anxiety</b><br>Likert scale for anxiety regarding the effects of radiation on the thyroid (1–10) before explanatory meeting                                                                    | [Mann-Whitney U test, or Kruskal-Wallis test with Bonferroni correction]<br><b>Demographics</b><br>Sex: man < woman<br>Job: teaching staff, and municipal employee < guardians < test subjects<br>Region of meeting: Soso < Kenpoku,                                                                                                                                                   | [Mann-Whitney U test, or Kruskal-Wallis test with Bonferroni correction]                                                                                                                                                                                               | No adjustment                                                                                                                                                                                                                                                             |

|                      |                                                                                                                                          |      |                 |                  |                                                                                                                                                                                                                                                             |                                                                                                                                                                                                 |                                                                                                                                  |
|----------------------|------------------------------------------------------------------------------------------------------------------------------------------|------|-----------------|------------------|-------------------------------------------------------------------------------------------------------------------------------------------------------------------------------------------------------------------------------------------------------------|-------------------------------------------------------------------------------------------------------------------------------------------------------------------------------------------------|----------------------------------------------------------------------------------------------------------------------------------|
|                      |                                                                                                                                          |      |                 |                  | kenchu < iwaki < Outside of Fukushima                                                                                                                                                                                                                       |                                                                                                                                                                                                 |                                                                                                                                  |
|                      |                                                                                                                                          |      |                 |                  | <b>Radiation related variables</b><br>Attitudes about radiation: collecting information about radiation, no one with whom to talk about radiation, no understanding about radiation                                                                         | <b>Radiation related variables</b><br>Attitudes about radiation: having family with whom to talk about radiation, having friends with whom to talk about radiation, not knowing about radiation |                                                                                                                                  |
| Sugimoto et al. [19] | Residents in Soma city: Participants in a radiation-health-seminar for a total of 1560 residents, at 12 different locations in Fukushima | 1560 | Cross sectional | Jun-11 to Jul-11 | <b>Original scale</b><br>The questionnaire contained 14 items addressing fears about radiation and health, future social and economic prospects, and the current social and physical circumstances in which respondents lived.<br>Radiation/health fear     | [multiple linear standardized regression coefficient (95%CI)]                                                                                                                                   | [multiple linear standardized regression coefficient (95%CI)]                                                                    |
|                      |                                                                                                                                          |      |                 |                  | <b>Demographics</b><br>Age: under 35 [0.24 (0.05 to 0.43)], between 35 to 49 [0.22 (0.07,0.36)] (ref. over 50), Woman [0.30 (0.17, 0.44)], Area (seaside < mountain): 0.30 (0.12 to 0.48),<br>Living with grandchild (yes > no) 0.30 (0.12 to 0.49)         |                                                                                                                                                                                                 | Age, sex, job, total number of media types used, cancer history, living area, living with children or grand children, media type |
|                      |                                                                                                                                          |      |                 |                  | <b>Trusted information</b><br>Use of rumors [0.22 (0.09 to 0.35)],                                                                                                                                                                                          |                                                                                                                                                                                                 |                                                                                                                                  |
|                      |                                                                                                                                          |      |                 |                  | Fears for future                                                                                                                                                                                                                                            |                                                                                                                                                                                                 |                                                                                                                                  |
|                      |                                                                                                                                          |      |                 |                  | <b>Demographics</b><br>Lower educational level [0.31 (0.13 to 0.49)],<br>Outdoor worker 0.59 (0.35 to 0.83), (ref. housewife),<br>Medical/education/technology worker [0.28 (0.02 to 0.39)] (ref. housewife),<br>Living with children [0.14 (0.01 to 0.27)] |                                                                                                                                                                                                 |                                                                                                                                  |
|                      |                                                                                                                                          |      |                 |                  | <b>Trusted information</b><br>Use of regional newspapers [0.18 (0.04, 0.32)]                                                                                                                                                                                |                                                                                                                                                                                                 | <b>Trusted information</b><br>Use of national newspapers[-0.14 (-0.26, -0.01)]                                                   |
|                      |                                                                                                                                          |      |                 |                  | Fears about social disruption                                                                                                                                                                                                                               | <b>Demographics</b><br>Elderly [20.18 (20.34 to 20.02)], Woman                                                                                                                                  |                                                                                                                                  |

[0.30 (0.19 to 0.42)]

**Trusted information**

Use of radio [0.16 (0.05,0.27)]

|                      |                                                   |      |                 |        |                                                        |                                                                                                                                                                                                                                                                                                                                                                                                                                                                                                                                                                                              |                                                                                                                                                                                                                                                                                                                                                                                                                                                                        |                                                                                                                                                                                                                                                                                           |
|----------------------|---------------------------------------------------|------|-----------------|--------|--------------------------------------------------------|----------------------------------------------------------------------------------------------------------------------------------------------------------------------------------------------------------------------------------------------------------------------------------------------------------------------------------------------------------------------------------------------------------------------------------------------------------------------------------------------------------------------------------------------------------------------------------------------|------------------------------------------------------------------------------------------------------------------------------------------------------------------------------------------------------------------------------------------------------------------------------------------------------------------------------------------------------------------------------------------------------------------------------------------------------------------------|-------------------------------------------------------------------------------------------------------------------------------------------------------------------------------------------------------------------------------------------------------------------------------------------|
| Murakami et al. [20] | General population (from Tokyo, Osaka, Fukushima) | 9249 | Cross sectional | Dec-15 | <b>Slovic's model of risk perception</b><br>Dread risk | <p>[Multiple linear regression coefficient (95%CI), standardized regression coefficient]</p> <p><b>Demographics</b></p> <p>Fukushima (evacuated) [0.131 (0.017, 0.246), 0.023] (ref. Osaka),</p> <p>Woman [0.140 (0.100–0.180, 0.074],</p> <p>Presence spouse [0.070 (0.020, 0.121), 0.037]</p> <p>Presence children [0.122 (0.071, 0.172), 0.064]</p> <p>Smoking habit [0.077 (0.029, 0.125), 0.033]</p>                                                                                                                                                                                    | <p>[multiple linear regression coefficient (95%CI), standardized regression coefficient]</p> <p><b>Demographics</b></p> <p>Fukushima (not evacuated) [-0.290 (-0.347, -0.233), 0.102] (ref. Osaka) ,</p> <p>Neither in science or humanities course [-0.078 (-0.130, -0.025), 0.031] (ref. humanities),</p> <p>Major in science course [-0.078 (-0.130, -0.025), 0.031] (ref. humanities)</p>                                                                          | Habitation (Tokyo, Osaka, Fukushima (evacuated, not evacuated), sex, age, employee, spouse, children, grandchildren, educational status, smoking, trusted information (TV and radio, researcher-direct, newspapers, central government, friends-direct, researcher-online, others-online) |
|                      |                                                   |      |                 |        | Unknown risk                                           | <p><b>Trusted information</b></p> <p>Trust for direct information from friend [0.161 (0.087, 0.236), 0.044]</p> <p>Trust for online information from researcher [0.088 (0.036, 0.140), 0.037]</p> <p>Trust for online information from others [0.210 (0.131, 0.288), 0.059]</p> <p>[multiple linear regression coefficient (95%CI), standardized regression coefficient]</p> <p><b>Demographics</b></p> <p>Woman [0.076 (0.038, 0.114), 0.044],</p> <p>Presence children [0.111 (0.077–0.146) 0.065] (ref. absence of children etc.),</p> <p>Smoking habit 0.080 [(0.036, 0.123), 0.038]</p> | <p><b>Trusted information</b></p> <p>Trust for TV and radio [-0.051 (0.010, 0.092), 0.026],</p> <p>Trust for central government [-0.251 (-0.303, -0.198), -0.100],</p> <p>[multiple linear regression coefficient (95%CI), standardized regression coefficient]</p> <p><b>Demographics</b></p> <p>Fukushima (not evacuated) [-0.261 (-0.312, -0.209), -0.102] (ref. Osaka),</p> <p>Self-employment [-0.104 (-0.174, -0.034), -0.031] (ref. company employees etc.)</p> | Habitation (Tokyo, Osaka, Fukushima (evacuated, not evacuated), sex, age, employee, spouse, children, grandchildren, educational status, smoking, trusted information (TV and radio, researcher-direct, newspapers, central government, friends-direct, researcher-online, others-online) |
|                      |                                                   |      |                 |        |                                                        | <p><b>Trusted information</b></p> <p>Trust for TV and radio [0.128 (0.091, 0.164), 0.073],</p> <p>Trust for direct information from friend [0.135 (0.068, 0.203)], 0.041],</p> <p>Trust for online information from others</p>                                                                                                                                                                                                                                                                                                                                                               | <p><b>Trusted information</b></p> <p>Trust for central government[-0.178 (-0.225, -0.130), -0.079],</p>                                                                                                                                                                                                                                                                                                                                                                |                                                                                                                                                                                                                                                                                           |

|                     |                               |      |                 |        |                                                              |                                                                                                                                                                                                                                              |                                                                                                             |
|---------------------|-------------------------------|------|-----------------|--------|--------------------------------------------------------------|----------------------------------------------------------------------------------------------------------------------------------------------------------------------------------------------------------------------------------------------|-------------------------------------------------------------------------------------------------------------|
|                     |                               |      |                 |        |                                                              | [0.109 (0.043, 0.176), 0.034]                                                                                                                                                                                                                | Trust for direct information from researcher [-0.085 (-0.131, -0.038), -0.038]                              |
| Sugimoto et al [32] | National wide random subjects | 5809 | Cross sectional | Mar-12 | <b>Single item overall rating</b><br>Concern about radiation | [Odds ratio (95%CI) from multiple logistic regression]<br><b>Demographics</b><br>Woman [1.67 (1.35–2.06)], Married [1.53(1.33–1.77)],<br>Tohoku region invoking of disaster relief act [3.36(2.25–5.01)],<br>Kanto region [2.08 (1.58–2.74)] | [Odds ratio (95%CI) from multiple logistic regression]<br><b>Demographics</b><br>Student [0.72(0.53–0.98 )] |

---

**Table S2.** Summaries of included articles examined effect of risk perceptions and anxieties regarding radiation after the FDNPP accident.

| Effect of Anxiety about Radiation |                                                           |                                           |                 |                            |                                                                                                                                                                                    |                                                                                                                                                                                                                    |                                                                                                                                                                                                                                                                                                |
|-----------------------------------|-----------------------------------------------------------|-------------------------------------------|-----------------|----------------------------|------------------------------------------------------------------------------------------------------------------------------------------------------------------------------------|--------------------------------------------------------------------------------------------------------------------------------------------------------------------------------------------------------------------|------------------------------------------------------------------------------------------------------------------------------------------------------------------------------------------------------------------------------------------------------------------------------------------------|
| Citation                          | Subject characteristics                                   | N                                         | Study design    | Period for data collection | Measure for risk perception or anxiety                                                                                                                                             | Outcome of risk perception or anxiety regarding radiation                                                                                                                                                          | Adjusted covariates                                                                                                                                                                                                                                                                            |
| Suzuki et al. [7]                 | Residents of Fukushima                                    | 56 556                                    | Cross sectional | Jan-12                     | <b>Lindell's risk perception model</b><br>Immediate health effect<br>Delayed health effect<br>Genetic effect                                                                       | [Odds Ratio (95%CI) from multiple logistic regression]<br>Severe psychological distress [1.64 (1.42–1.89)]<br>Severe psychological distress [1.48 (1.32–1.67)]<br>Severe psychological distress [2.17 (1.94–2.42)] | Individual characteristics and disaster-related stressors                                                                                                                                                                                                                                      |
| Orita et al. [11]                 | Kawauchi Municipal Government officer                     | 127 (71: do not return, 56: had returned) | Cross sectional |                            | <b>Single item overall radiation anxiety</b><br>Anxiety to radiation exposure (yes or no)<br><br>Anxiety to radiation exposure by eating (yes or no)                               | [Odds Ratio (95%CI) from multiple logistic regression]<br>Anxiety to radiation exposure on intention do not return to hometown [8.91 (3.23–24.58)]                                                                 | Sex, measured dose rate at their home, Employment, difficulty of being away from familiar stores, anxiety to radiation exposure by eating                                                                                                                                                      |
| Takeda et al. [12]                | Alpine employees                                          | 343                                       | Cross sectional | Oct-14 to Jun-15           | <b>Single item specific radiation effect</b><br>Did you feel considerable effects of radiation while at work?                                                                      | [Odds Ratio (95%CI) from multiple logistic regression]<br>Greater risk perception about influence of radiation on the workplace predict intention to leave their jobs [0.33 ( 0.14–0.80)]                          | Age, born in Fukushima, marital status, living with preschool child, measurement of the ambient dose rate in the house after the accident, Anxiety about relationships with colleagues after the accident, A person to consult about radiation in the workplace                                |
| Nukui et al. [21]                 | Mental health hospital nurse in Fukushima prefecture      | 730                                       | Cross sectional | Aug-15, Nov-15             | <b>Slovic's model of risk perception</b><br>Dread risk<br><br>Lindell's model of risk perception<br>Immediate effect (effect on own health)<br><br>Unknown risk<br>Controllability | [Odds Ratio (95%CI) from multiple logistic regression]<br>High risk mental health [1.19 (1.05–1.34)]<br><br>High mental health [0.87 (0.78–0.98)]<br><br>not significant.<br>not significant.                      |                                                                                                                                                                                                                                                                                                |
| Murakami et al. [22]              | Residents in Marumori Town, Igu County, Miyagi prefecture | 698                                       | Cross sectional | Mar-15                     | <b>Slovic's risk perception model</b><br>Dread risk<br>Unknown<br><br><b>Single item overall rating</b><br>Change anxiety about radiation after                                    | [Odds Ratio (95%CI) from multiple logistic regression]<br>Reduction radiation anxiety [OR: 0.22 (95%CI 0.11–0.45)]<br>not significant.<br><br>[Odds Ratio (95%CI) from multiple logistic regression]               | Sex, age, presence of a jobless person, subjective feeling on health, evaluation of announcements, evaluation of decontamination, evaluation of whole body counter<br><br>Sex, age, presence of a jobless person, subjective feeling on health, sense of attachment to the town, importance of |

|                      |                                                                                                                |       |                    |                     | the accident                                                                                                                                                                                                | Satisfaction with life<br>for low current anxiety [3.09 (1.22–<br>7.84)], for high current anxiety [3.00<br>(1.17–7.74)]                                                                                                                                                                                                                                          | happiness                                                                                                                                                                                                                                                                   |
|----------------------|----------------------------------------------------------------------------------------------------------------|-------|--------------------|---------------------|-------------------------------------------------------------------------------------------------------------------------------------------------------------------------------------------------------------|-------------------------------------------------------------------------------------------------------------------------------------------------------------------------------------------------------------------------------------------------------------------------------------------------------------------------------------------------------------------|-----------------------------------------------------------------------------------------------------------------------------------------------------------------------------------------------------------------------------------------------------------------------------|
|                      |                                                                                                                |       |                    |                     | Current anxiety about radiation                                                                                                                                                                             |                                                                                                                                                                                                                                                                                                                                                                   |                                                                                                                                                                                                                                                                             |
| Oe et al.<br>[23]    | Residents who were<br>registered in the<br>municipalities<br>categorized as complete<br>evacuation order areas | 12371 | Cross<br>sectional | Jan-13              | <b>Lindell's risk perception model</b><br>Delayed effect of radiation<br><br>Genetic effect of radiation                                                                                                    | not significant.<br>[Odds Ratio (95%CI) from multiple<br>logistic regression]<br>not significant.<br><br>Severe distress trajectory group [3.91<br>(3.17–4.83)]                                                                                                                                                                                                   | Sex, age at disaster,<br>health-related variables<br>problem drinking, subjective sleep insufficiency, poor<br>social support<br>disaster-related variables<br>disaster related home damage, disaster related<br>bereavement, relocation 5 times or more after the disaster |
| Orita et al.<br>[24] | Residents of Kawauchi<br>village                                                                               | 285   | Cross<br>sectional | May-14 to<br>Jun-14 | <b>Lindell's risk perception model</b><br><br>Delayed effect<br>(health effects on children)<br><br>Genetic effect<br>(health effects on offspring)                                                         | [Odds Ratio (95%CI) from multiple<br>logistic regression]<br><br>Risk perception for acute radiation<br>syndrome (ARS) might develop for<br>general population by the FDNPP<br>accident [31.01 (3.35, 286.65)]<br><br>Risk perception for acute radiation<br>syndrome (ARS) might develop for<br>general population by the FDNPP<br>accident [4.73 (1.25, 17.90)] | Sex, age, Did you live in Kami-Kawauchi, not Shimo-<br>Kawauchi before the accident?, Are you reluctant to eat rice<br>or vegetables produced in the village?, Are you reluctant to<br>radiological examination in the hospital?                                            |
|                      |                                                                                                                |       |                    |                     | <b>Original items</b><br>Do you have anxiety about health<br>effects would appear in the general<br>population simply by living in an<br>environment with a 0.23 µSv per hour<br>ambient dose for one year? | Risk perception for acute radiation<br>syndrome (ARS) might develop for<br>general population by the FDNPP<br>accident [6.87 (2.67, 17.71)]                                                                                                                                                                                                                       | Sex, age, Did you live in Kami-Kawauchi, not Shimo-<br>Kawauchi before the accident?, Are you reluctant to eat rice<br>or vegetables produced in the village?, Are you reluctant to<br>radiological examination in the hospital?                                            |
|                      |                                                                                                                |       |                    |                     | Reluctant to eat food produced in the<br>village<br><br>Do you believe that adverse health<br>effects would occur in the general<br>population by eating 100 Bq per kg of<br>mushrooms for one year?        | not significant.<br><br>Risk perception for acute radiation<br>syndrome (ARS) might develop for<br>general population by the FDNPP<br>accident [3.54 (1.13–11.12)]                                                                                                                                                                                                | Experience in nursing the patients with radiation therapy,<br>Relatively high ambient dose rate around the house ,                                                                                                                                                          |
| Sato et al.<br>[25]  | Nurses who were<br>working at the                                                                              | 345   | Cross<br>sectional | Jun-13              | <b>Lindell's risk perception model</b><br>Perception of adverse health effects                                                                                                                              | [Odds Ratio (95%CI) from multiple<br>logistic regression]                                                                                                                                                                                                                                                                                                         |                                                                                                                                                                                                                                                                             |

|                      |                                                                        |                              |                 |           |                                                                                                                                                                                                                                                |                                                                                                                                                                                                                    |                                                                                                                                                                                                                                     |
|----------------------|------------------------------------------------------------------------|------------------------------|-----------------|-----------|------------------------------------------------------------------------------------------------------------------------------------------------------------------------------------------------------------------------------------------------|--------------------------------------------------------------------------------------------------------------------------------------------------------------------------------------------------------------------|-------------------------------------------------------------------------------------------------------------------------------------------------------------------------------------------------------------------------------------|
|                      | Fukushima Medical University Hospital at the time of the FDNPP         |                              |                 |           |                                                                                                                                                                                                                                                | Subjects who were considered of the possible radiation health effects in children tend to have intention to leave their jobs than not considered [1.96 (1.02–3.54)]                                                | Consideration of evacuation from Fukushima, living with preschooler , Anxiety about life in Fukushima city after the accident (no < yes), Anxiety about relationships with colleagues in the hospital after the accident (no < yes) |
| Matsuoka et al. [33] | Disaster medical assistance team workers deployed at the disaster area | 424                          | Cross sectional | Apr-12    | <b>Single item overall rating</b><br>Were you concerned over radiation exposure during the deployment? (yes or no)                                                                                                                             | [Analysis of covariance]<br>Psychological Distress (K6), Depression (CES-D), Posttraumatic symptom (PDI or IES-R) were greater among workers who have concerned over radiation exposure than workers who have not. | Age, occupation, disaster operation experience, duration of time spent watching earthquake news, past history of psychiatric illness                                                                                                |
| Goto et al. [34]     | Women who registered their pregnancies in Fukushima prefecture         | 6686 in 2012<br>6423 in 2013 | Cross sectional | 2012–2013 | <b>Single item overall rating</b><br>Concern about radiation, defined as bottle feeding their babies because of radiation concerns (vs breast feeding, bottle feeding as a result of lack of breast milk, or bottle feeding for other reasons) | [Odds Ratio (95%CI) from multiple logistic regression]<br>Concern about radiation were significantly associated with depressive symptoms. [3.41 (2.59–4.50)]                                                       | Age, postpartum days, at the time of survey, first-time motherhood, obstetrical complications                                                                                                                                       |

**Table S3.** Summaries of included articles examined time related change or modifiability of risk perceptions and anxieties regarding radiation after the FDNPP accident.

| Citation             | Subject Characteristics                                                                                                                                                                                                                                                               | N                                                                                                                               | Study Design                | Period for Data Collection               | Measure for Risk Perception or Anxiety                                                                                                                                                                                                                            | Time Related Change or Modifiability                                                                                                                                                                                                                                                                                          |
|----------------------|---------------------------------------------------------------------------------------------------------------------------------------------------------------------------------------------------------------------------------------------------------------------------------------|---------------------------------------------------------------------------------------------------------------------------------|-----------------------------|------------------------------------------|-------------------------------------------------------------------------------------------------------------------------------------------------------------------------------------------------------------------------------------------------------------------|-------------------------------------------------------------------------------------------------------------------------------------------------------------------------------------------------------------------------------------------------------------------------------------------------------------------------------|
| Assessment only      |                                                                                                                                                                                                                                                                                       |                                                                                                                                 |                             |                                          |                                                                                                                                                                                                                                                                   |                                                                                                                                                                                                                                                                                                                               |
| Yoshii et al. [26]   | Study participants were mothers who had delivered a child less than one month before the Great East Japan Earthquake that occurred on March 11, 2011, and pregnant women                                                                                                              | 259                                                                                                                             | Cross-sectional descriptive | Jul-12                                   | Item derived from open-ended question regarding radiation anxiety. anxiety about food safety, safety of the outdoors, effects of radiation on embryos during pregnancy, effects on children, radiation effects, Economy, distressful feelings about announcements |                                                                                                                                                                                                                                                                                                                               |
| Time related change  |                                                                                                                                                                                                                                                                                       |                                                                                                                                 |                             |                                          |                                                                                                                                                                                                                                                                   |                                                                                                                                                                                                                                                                                                                               |
|                      |                                                                                                                                                                                                                                                                                       |                                                                                                                                 |                             |                                          |                                                                                                                                                                                                                                                                   | time related change                                                                                                                                                                                                                                                                                                           |
| Kohzaki et al. [27]  | 1) Residents inside or 2) outside Fukushima, 3) Doctors inside or 4) outside Fukushima, and 5) medical student                                                                                                                                                                        | 1) 2013: 422, 2011: 959<br>2) 2013: 93, 2011: 31<br>3) 2013: 80, 2011: 83<br>4) 2013: 227, 2011: 388<br>5) 2013: 108, 2011: 106 | Cross sectional cohort      | Sep-11 to Nov-11<br><br>Aug-13 to Nov-13 | How do you feel about the future radiation effect after FDNPP accident?<br>(a) No anxious, (b) Slightly anxious, (c) Anxious, (d) Very anxious, (e) Unknown                                                                                                       | The response ratio low anxiety about radiation (including response no anxiety and slight anxiety) changed from 27 to 53% among residents inside Fukushima, no anxiety changed from 8 to 37% among residents outside Fukushima, no anxiety changed from 21 to 40% among doctors inside Fukushima overtime (from 2011 to 2013). |
| Ito et al. [28]      | Women who received a Maternal and Child Health Handbook either from a municipal office in another prefecture or from Fukushima prefecture and delivered their babies in Fukushima prefecture on or after March 11, 2011 (excluding miscarriages, induced abortions, and stillbirths). | 2011: 8575<br>2012: 6921<br>2013: 7022                                                                                          | Cross-sectional cohort      | 2011–2013                                | Free opinion                                                                                                                                                                                                                                                      | Ratio of opinion about radiation effect on fetus was decreasing overtime<br><br>Descriptive data:<br>2011:12.6%(29.8%), 2012: 5.6(26.8%); 2013: 2.0% (17.4%)<br>Ratio among response of free opinion are given in parentheses.                                                                                                |
| Intervention         |                                                                                                                                                                                                                                                                                       |                                                                                                                                 |                             |                                          |                                                                                                                                                                                                                                                                   |                                                                                                                                                                                                                                                                                                                               |
| Hino et al. [18]     | Explanatory meeting Participants (749 people in Fukushima and 50 outside Fukushima (in Yamagata) participated)                                                                                                                                                                        | 594                                                                                                                             | Pre-post no control arm     | Sep-14 to Jun-15                         | Likert scale for anxiety regarding the effects of radiation on the thyroid (1–10)                                                                                                                                                                                 | Change anxiety from participation explanatory meeting<br><br>Moderator of the effect:<br>sex (woman > man),<br>size (49–99 > more than 100),<br>satisfaction with provided objective data and cancer information (not applicable > applicable)                                                                                |
| Sugimoto et al. [20] | Residents in Soma city: Participants in a radiation-health-seminar for a total of 1560 residents, at 12 different locations in Fukushima                                                                                                                                              | 1560                                                                                                                            | Pre-post no control arm     | Jun-11 to Jul-11                         | Radiation/health fear, fears for future. fears about social disruption                                                                                                                                                                                            | All three factors showed a statistically significant decrease from pre- to post- seminar testing (paired t-test p-value,0.0001 in all cases).                                                                                                                                                                                 |

|                        |                                                                                                                                                  |                                       |                                                                                  |                     |                                                                                                                                                                                                                                                                                                                                                                                                                               |                                                                                                    |
|------------------------|--------------------------------------------------------------------------------------------------------------------------------------------------|---------------------------------------|----------------------------------------------------------------------------------|---------------------|-------------------------------------------------------------------------------------------------------------------------------------------------------------------------------------------------------------------------------------------------------------------------------------------------------------------------------------------------------------------------------------------------------------------------------|----------------------------------------------------------------------------------------------------|
| Midorikawa et al. [29] | Explanatory meetings for parents of tested children                                                                                              | 501                                   | Descriptive                                                                      | Since 2013          | Pre post meeting anxiety concerning effects of radiation on the thyroid (decrease, no change, and increase)                                                                                                                                                                                                                                                                                                                   | Decreased: 60.1%, unchanged: 30.7%; increased: 5.6%, unknown: 3.6%                                 |
| Fujii et al. [30]      | Immediate post examination individual counseling                                                                                                 | 453                                   | Descriptive                                                                      | Oct-14              | Assuaging of anxiety (5 point likert type scale                                                                                                                                                                                                                                                                                                                                                                               | Relieved(5): 69%, relieved(4): 19%, (3): 8.8%, (2): 2.4%, (1): 0.9% not relieved                   |
|                        | Fifty-eight groups of parents and two expecting mothers participated in the one-to-one consultations with a radiologist held in Nagareyama city. | No detail available                   | Descriptive                                                                      | No detail available | Anxiety and fear of the radiation exposure issues                                                                                                                                                                                                                                                                                                                                                                             |                                                                                                    |
| Imamura et al. [31]    | Mothers living with a preschool children in Fukushima city or neighboring smaller municipalities                                                 | 37<br>(intervention: 18, control: 19) | Randomized two arm controlled trial<br>Permuted-block randomization waiting list | Aug-14 to Nov-14    | This scale consists of seven items asking about the respondents' fears and worries of effects of radiation exposure on their own health and the next generation's health, and the effect of news reports on the accident at the nuclear power plant, among others. The response options (item scores) were on a four-point scale, from totally disagree (1) to totally agree (4). The total scale scores ranged from 7 to 28. | No statistical significant decrease was showed at post, 1 month, and 3month after the intervention |

---
